# Supplementary material
Source: Royal Society of Chemistry journal article supplement (doi:10.1039/d6fo00618c)
Supplement: d6fo00618c1.pdf [file d6fo00618c1.pdf]

***Lactobacillus\_rhamnosus* GG reverses zearalenone-induced pathological  
macrophage polarization to restore placental angiogenesis and efficiency**

Peiqiang Yuan<sup>1</sup>, Bin Feng<sup>1</sup>, Yan Lin<sup>1</sup>, Shengyu Xu<sup>1</sup>, Lun Hua<sup>1</sup>, Yong Zhuo<sup>1</sup>, Lianqiang  
Che<sup>1</sup>, De Wu<sup>1</sup>, Zhengfeng Fang<sup>1,2\*</sup>

<sup>1</sup> Key Laboratory for Animal Disease Resistance Nutrition of the Ministry of Education,  
Animal Nutrition Institute, Sichuan Agricultural University, Chengdu 611130, People's  
Republic of China; <sup>2</sup> Key laboratory of agricultural product processing and nutrition  
health (Co-construction by Ministry and Province), Ministry of Agriculture and Rural  
Affairs and, College of Food Science, Sichuan Agricultural University, Ya'an 625014,  
People's Republic of China.

\*Corresponding author: Zhengfeng Fang

Tel: +86-28-86290920, email: fangzhengfeng@hotmail.com

**Supplemental Table S1** Ingredients and nutritional levels of diet for pregnant sows

| Ingredients         | Ration, % | Nutritional levels                                | Content |
|---------------------|-----------|---------------------------------------------------|---------|
| Corn                | 63.15     | Crude protein, %                                  | 14.58   |
| Soybean meal        | 14.5      | Digestible energy, Kcal/kg                        | 3063    |
| Wheat bran          | 18        | Standard ileal digestible lysine, %               | 0.60    |
| Fish meal           | 1         | Calcium, %                                        | 0.81    |
| Methionine          | 0.02      | Total phosphorus, %                               | 0.69    |
| Threonine           | 0.01      | Standardized total tract digestible phosphorus, % | 0.41    |
| Limestone           | 1.01      |                                                   |         |
| Dicalcium phosphate | 1.21      |                                                   |         |
| Sodium chloride     | 0.45      |                                                   |         |
| Choline Chloride    | 0.15      |                                                   |         |
| *Premix             | 0.50      |                                                   |         |
| Total               | 100       | □                                                 | □       |

\*Each kilogram of feed contains: Vitamin A, 8 000IU; Vitamin D3, 600IU; Vitamin E, 60IU; Vitamin K, 4mg; Vitamin B1, 5mg; Vitamin B2, 8mg; Vitamin B6, 7.5mg; Vitamin B12, 0.02mg; D-biotin, 0.2mg; D-pantothenic acid, 20mg; Folic acid, 1.5mg; Niacinamide, 30mg; Copper, 16mg; Iron, 165mg; Iodine, 0.3mg; Zinc, 165mg; Manganese, 30mg; Selenium, 0.3mg.

**Supplemental table S2** AIN-93M diet formulated for maintenance of adult rodents

| Ingredient                                                    | g/kg diet |
|---------------------------------------------------------------|-----------|
| Cornstarch                                                    | 465.692   |
| Casein (>85% protein)                                         | 140       |
| Dextrinized cornstarch (90-94% tetrasaccharides) <sup>1</sup> | 155       |
| Sucrose                                                       | 100       |
| Soybean oil (no additives)                                    | 40        |
| Fiber <sup>2</sup>                                            | 50        |
| Mineral mix (AIN-93M-MX)                                      | 35        |
| Vitamin mix (AIN-93-VX)                                       | 10        |
| L-Cystine                                                     | 1.8       |
| Choline bitartrate (41.1% choline) <sup>3</sup>               | 2.5       |
| Tert-butylhydroquinone                                        | 0.008     |

**Supplemental table S3** Estimated minimal nutrient composition of AIN-93M rodent diets

| Nutrient                       | AIN-93M, /kg diet |
|--------------------------------|-------------------|
| Total energy, kcal             | 3601              |
| % as protein                   | 14.1              |
| % as CHO                       | 75.9              |
| % as fat                       | 10                |
| Moisture, g                    | 68                |
| Total fat,g                    | 40                |
| Saturated, g                   | 6.2               |
| Monounsaturated, g             | 9.3               |
| Polyunsaturated, g             | 23.1              |
| Linoleic acid, g               | 10.4              |
| Linolenic acid, g              | 2.7               |
| Total carbohydrate, g          | 727.3             |
| Complex carbohydrates, g       | 421.9             |
| Simple sugars, g               | 257.9             |
| Cellulose, g                   | 47.5              |
| Total protein, g               | 125.8             |
| Amino acids (typical analysis) |                   |
| Alanine, g                     | 3.3               |
| Arginine, g                    | 4.5               |

|                  |      |
|------------------|------|
| Aspartic acid, g | 8    |
| Cystine, g       | 2.4  |
| Glutamic acid, g | 25.5 |
| Glycine, g       | 2.3  |
| Histidine, g     | 3.3  |
| Isoleucine, g    | 5.9  |
| Leucine, g       | 10.9 |
| Lysine, g        | 9.2  |
| Methionine, g    | 3.3  |
| Phenylalanine, g | 6.2  |
| Proline, g       | 14.3 |
| Serine, g        | 6.7  |
| Threonine, g     | 4.7  |
| Tryptophan, g    | 1.6  |
| Tyrosine, g      | 6.6  |
| Valine, g        | 7    |
| Total ash, g     | 38.9 |
| Minerals         |      |
| Calcium, mg      | 5000 |
| Phosphorus, mg   | 3000 |
| Magnesium, mg    | 511  |
| Sodium, mg       | 1033 |

|                        |      |
|------------------------|------|
| Potassium, mg          | 3600 |
| Chloride, mg           | 1613 |
| Sulfur (inorganic), mg | 300  |
| Iron, mg               | 45   |
| Zinc, mg               | 35   |
| Manganese, mg          | 10   |
| Copper, mg             | 6    |
| Iodine, mg             | 0.2  |
| Molybdenum, mg         | 0.15 |
| Selenium, mg           | 0.17 |
| Silicon, mg            | 5    |
| Chromium, mg           | 1    |
| Fluoride, mg           | 1    |
| Nickel, mg             | 0.5  |
| Boron, mg              | 0.5  |
| Lithium, mg            | 0.1  |
| Vanadium, mg           | 0.1  |
| Vitamin                |      |
| Nicotinic acid, mg     | 30   |
| Ca pantothenate, mg    | 15   |
| Pyridoxine, mg         | 6    |
| Thiamin, mg            | 5    |

|                  |      |
|------------------|------|
| Riboflavin, mg   | 6    |
| Folie acid, mg   | 2    |
| Biotin, mg       | 0.2  |
| Vitamin B-12, µg | 25   |
| Vitamin K, µg    | 860  |
| Vitamin E, IU    | 75   |
| Vitamin A, IU    | 4000 |
| Vitamin D, IU    | 1000 |
| Choline, mg      | 1000 |

---

**Supplemental table S4** Primer sequences for the target and reference genes

| Gene           | GenBank No.    | Sequence (5'-3')          | Length |
|----------------|----------------|---------------------------|--------|
| Rat            |                |                           |        |
| iNOS           | NM_012611.3    | F: CCAAGGTGACCTGAAAGAGGAA | 22     |
|                |                | R: ATCCTGTGTTGTTGGGCTGG   | 20     |
| Arg-1          | NM_017134.3    | F: GGTGGAGACCACAGTATGGC   | 20     |
|                |                | R: GCAGATTCCCAGAGCTGGTT   | 20     |
| Mrc-1          | NM_001106123.2 | F: TCTCCCTCAATGGAACACACAC | 22     |
|                |                | R: AAATTGCCGTGAGTCCAAGAGT | 22     |
| CD86           | NM_020081.2    | F: AAGACATGTGTAACCTGCACCA | 22     |
|                |                | R: AAGCTTGCCTCTTCACAGGA   | 20     |
| $\beta$ -Actin | NM_031144.3    | F: ACAACCTTCTTGCAGCTCCTC  | 21     |
|                |                | R: CTGACCCATACCCACCATCAC  | 21     |
| GAPDH          | NM_017008.4    | F: TCTCTGCTCCTCCCTGTTCT   | 20     |
|                |                | R: CGATACGGCCAAATCCGTTC   | 20     |
| Pig            |                |                           |        |
| iNOS           | NM_001143690.1 | F: AGCCCAGAGGGCTTTATCAC   | 20     |
|                |                | R: GGTGGGAGCACATCTAGCTT   | 20     |
| Arg-1          | NM_214048.2    | F: TTTCTCCAAGGGTCAGCCAC   | 20     |
|                |                | R: AGGGACATCAGCAAAGCACA   | 20     |
| GADPH          | NM_001206359.1 | F: CCAAGGAGTAAGAGCCCCTG   | 20     |
|                |                | R: AAGTCAGGAGATGCTCGGTG   | 20     |

|                |                |                         |    |
|----------------|----------------|-------------------------|----|
|                |                | F: CTCCAGAGCGCAAGTACTCC | 20 |
| $\beta$ -actin | XM_003124280.4 |                         |    |
|                |                | R: AATGCAACTAACAGTCCGCC | 20 |

---

Abbreviations: iNOS, nitric oxide synthase 2; Arg-1, arginase 1; CD86, CD86 molecule; MRC-1, mannose receptor C-type 1.

**Supplemental table S5** The table of RNA-Seq data statistics

| Samples | Clean reads | Clean bases   | GC Content | ≥Q30%  |
|---------|-------------|---------------|------------|--------|
| CONA1   | 30,039,724  | 8,991,233,740 | 49.45%     | 95.27% |
| CONA2   | 21,803,861  | 6,528,555,488 | 49.28%     | 95.22% |
| CONA3   | 20,325,689  | 6,084,468,594 | 49.85%     | 95.22% |
| LGGB1   | 27,674,602  | 8,283,567,640 | 49.65%     | 94.97% |
| LGGB2   | 25,300,177  | 7,572,464,272 | 49.73%     | 94.87% |
| LGGB3   | 28,038,660  | 8,394,408,484 | 49.82%     | 95.12% |
| Z1C1    | 20,843,461  | 6,240,087,442 | 49.70%     | 95.62% |
| Z1C2    | 20,506,416  | 6,138,710,262 | 49.66%     | 95.47% |
| Z1C3    | 29,865,321  | 8,938,388,192 | 49.42%     | 95.08% |
| Z1LE1   | 28,474,544  | 8,524,387,496 | 49.72%     | 95.14% |
| Z1LE2   | 21,869,974  | 6,547,998,628 | 49.53%     | 95.34% |
| Z1LE3   | 25,608,016  | 7,668,075,754 | 49.77%     | 95.40% |
| Z2D1    | 21,770,589  | 6,517,328,478 | 49.57%     | 95.45% |
| Z2D2    | 21,725,665  | 6,500,975,158 | 49.67%     | 95.25% |
| Z2D3    | 29,261,223  | 8,758,763,260 | 49.25%     | 94.95% |
| Z2LF1   | 29,501,810  | 8,829,708,756 | 49.83%     | 95.22% |
| Z2LF2   | 21,357,973  | 6,393,895,912 | 49.50%     | 94.88% |
| Z2LF3   | 28,876,621  | 8,648,176,720 | 49.62%     | 95.25% |

Note:

(1) Samples: sample analysis ID.

- (2) Clean reads: Total number of pair-end reads in the Clean Data.
- (3) Clean bases: Total number of bases in the Clean Data.
- (4) GC content: The GC content of the Clean Data, i.e., the percentage of G and C bases among the total bases in the Clean Data.
- (5)  $\geq Q30\%$ : The percentage of bases with a quality score  $\geq 30$  in the Clean Data.

**Supplemental table S6** Statistical table of processing results of sample sequencing

data

| Sample ID | Raw CCS | Clean<br>CCS | Effective<br>CCS | AvgLen<br>(bp) | Effective<br>(%) |
|-----------|---------|--------------|------------------|----------------|------------------|
| CON1      | 59,963  | 59,825       | 49,555           | 1,455          | 82.64            |
| CON10     | 63,071  | 62,937       | 49,766           | 1,459          | 78.9             |
| CON2      | 56,142  | 56,013       | 45,432           | 1,456          | 80.92            |
| CON3      | 60,356  | 60,259       | 46,566           | 1,458          | 77.15            |
| CON4      | 67,744  | 67,581       | 56,448           | 1,457          | 83.33            |
| CON5      | 66,476  | 66,322       | 53,156           | 1,460          | 79.96            |
| CON6      | 67,969  | 67,815       | 55,515           | 1,459          | 81.68            |
| CON7      | 59,149  | 58,985       | 50,133           | 1,456          | 84.76            |
| CON8      | 54,332  | 54,237       | 44,256           | 1,454          | 81.45            |
| CON9      | 56,436  | 56,289       | 46,885           | 1,454          | 83.08            |
| ZEN1      | 66,095  | 65,982       | 55,670           | 1,453          | 84.23            |
| ZEN10     | 59,773  | 59,611       | 48,588           | 1,455          | 81.29            |
| ZEN2      | 56,239  | 56,047       | 46,458           | 1,458          | 82.61            |
| ZEN3      | 60,666  | 60,481       | 49,865           | 1,460          | 82.2             |
| ZEN4      | 66,281  | 66,146       | 53,176           | 1,460          | 80.23            |
| ZEN5      | 61,327  | 61,182       | 49,236           | 1,456          | 80.28            |
| ZEN6      | 64,949  | 64,836       | 54,135           | 1,456          | 83.35            |
| ZEN7      | 60,498  | 60,350       | 50,550           | 1,458          | 83.56            |

|          |        |        |        |       |       |
|----------|--------|--------|--------|-------|-------|
| ZEN8     | 68,932 | 68,823 | 55,891 | 1,457 | 81.08 |
| ZEN9     | 64,621 | 64,465 | 54,085 | 1,457 | 83.7  |
| ZENLGG1  | 68,423 | 68,254 | 55,955 | 1,455 | 81.78 |
| ZENLGG10 | 65,084 | 64,968 | 53,950 | 1,455 | 82.89 |
| ZENLGG2  | 54,768 | 54,626 | 44,455 | 1,455 | 81.17 |
| ZENLGG3  | 68,177 | 67,986 | 57,100 | 1,455 | 83.75 |
| ZENLGG4  | 61,702 | 61,430 | 51,964 | 1,455 | 84.22 |
| ZENLGG5  | 54,058 | 53,906 | 46,617 | 1,455 | 86.24 |
| ZENLGG6  | 62,358 | 62,188 | 50,909 | 1,455 | 81.64 |
| ZENLGG7  | 56,856 | 56,652 | 48,550 | 1,453 | 85.39 |
| ZENLGG8  | 40,106 | 39,936 | 36,710 | 1,454 | 91.53 |
| ZENLGG9  | 56,152 | 55,990 | 43,994 | 1,457 | 78.35 |

---

Note:

Sample ID: Sample name.

Raw-CCS: Number of Circular Consensus Sequence reads identified for the sample.

Clean CCS: Number of sequences after identification and primer removal.

Effective-CCS: Number of sequences used for subsequent analysis after length filtering and chimera removal.

AvgLen (bp): Average sequence length of the sample.

Effective (%): Percentage of Effective-CCS relative to Raw-CCS.

Below are the original data of the Western blot in the manuscript.

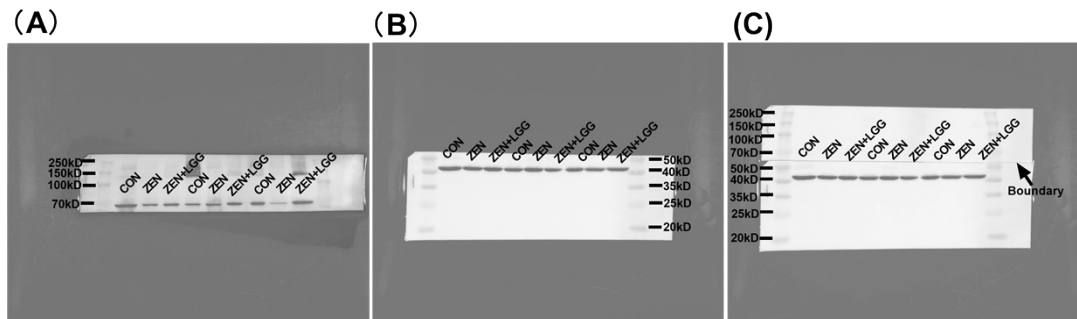

The raw data of iNOS protein expression in the placenta from Figure 2. (A) iNOS protein expression; (B)  $\beta$ -actin protein expression; (C) Co-expression of iNOS and  $\beta$ -actin on the same membrane. Abbreviations: CON, the control group; ZEN, the zearalenone group; ZEN+LGG, the zearalenone plus *Lactobacillus\_rhamnosus* GG group.

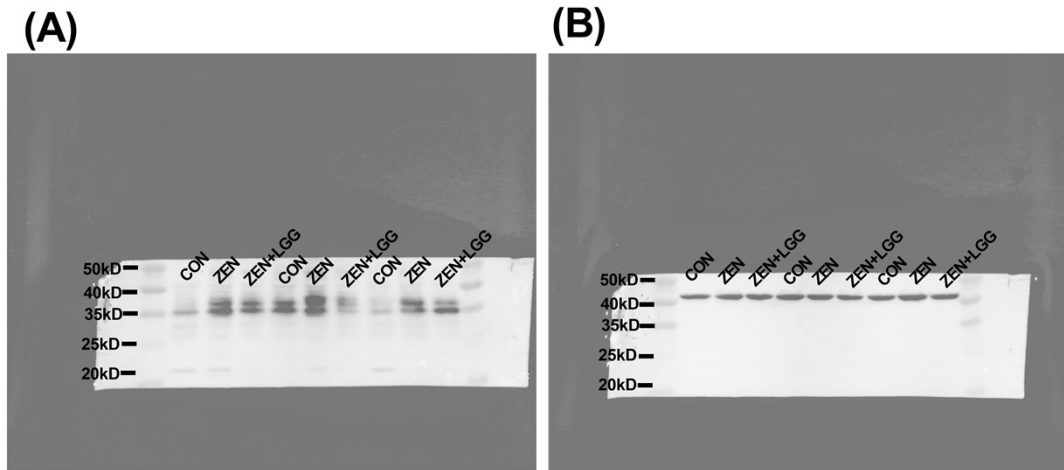

The raw data of Arg-1 protein expression in the placenta from Figure 2. (A) Arg-1 protein expression; (B)  $\beta$ -actin protein expression. Arg-1 and  $\beta$ -actin are expressed on the same membrane. Abbreviations: CON, the control group; ZEN, the zearalenone group; ZEN+LGG, the zearalenone plus *Lactobacillus\_rhamnosus* GG group.

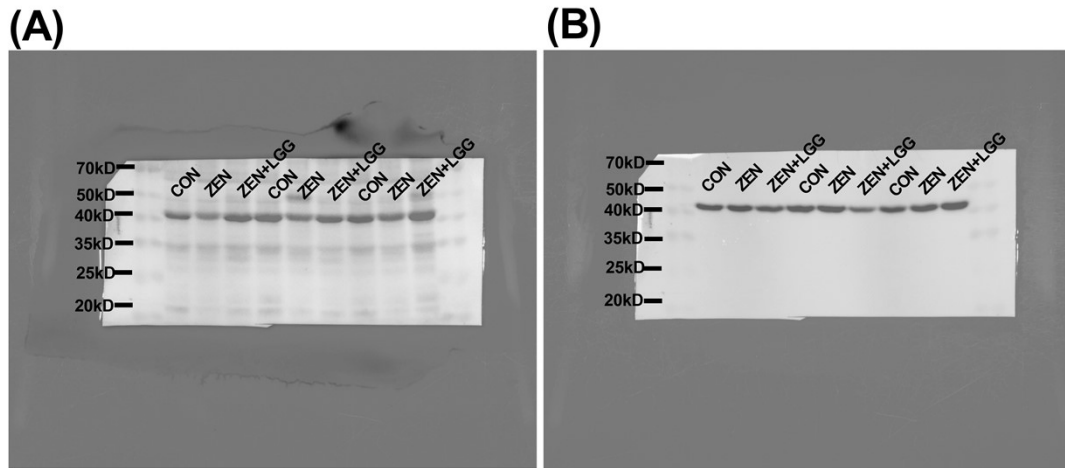

The raw data of VEGF protein expression in the placenta from Figure 2. (A) VEGF protein expression; (B)  $\beta$ -actin protein expression. VEGF and  $\beta$ -actin are expressed on the same membrane. Abbreviations: CON, the control group; ZEN, the zearalenone group; ZEN+LGG, the zearalenone plus *Lactobacillus\_rhamnosus* GG group.

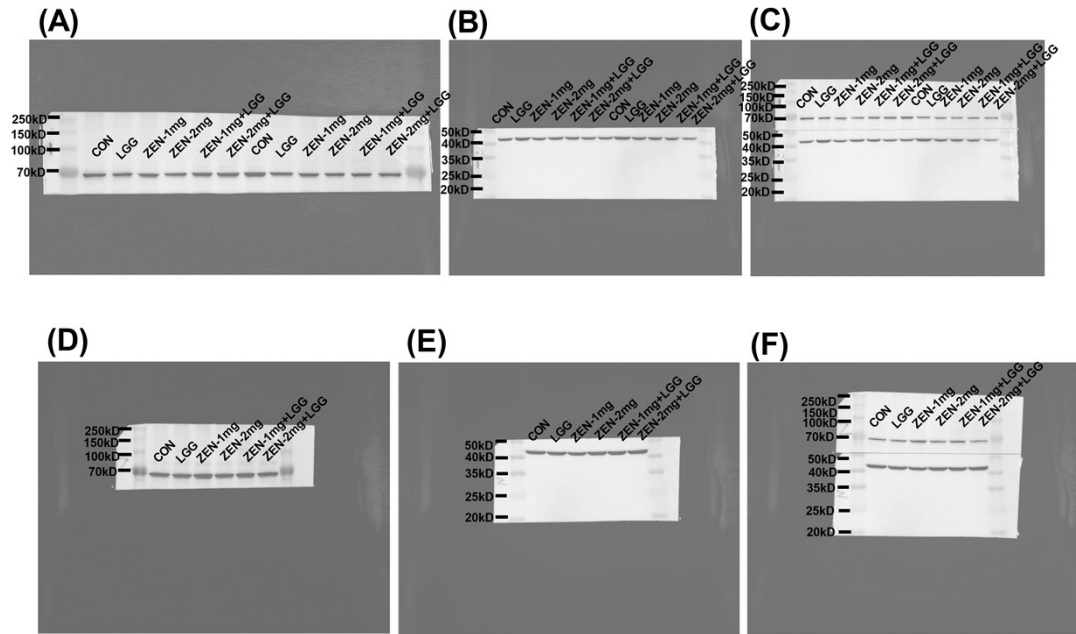

The raw data of iNOS protein expression in the liver from Figures 5. (A) iNOS protein expression; (B)  $\beta$ -actin protein expression; (C) Co-expression of iNOS and  $\beta$ -actin on the same membrane. (D) iNOS protein expression; (E)  $\beta$ -actin protein expression; (F) Co-expression of iNOS and  $\beta$ -actin on the same membrane. Abbreviations: CON, the control group; LGG, the *Lactobacillus\_rhamnosus* GG group; ZEN-1mg, zearalenone at 1 mg/kg body weight; ZEN-2mg, zearalenone at 2 mg/kg body weight; ZEN-1mg+LGG, zearalenone at 1 mg/kg body weight plus *Lactobacillus\_rhamnosus* GG; ZEN-2mg+LGG, zearalenone at 1 mg/kg body weight plus *Lactobacillus\_rhamnosus* GG.

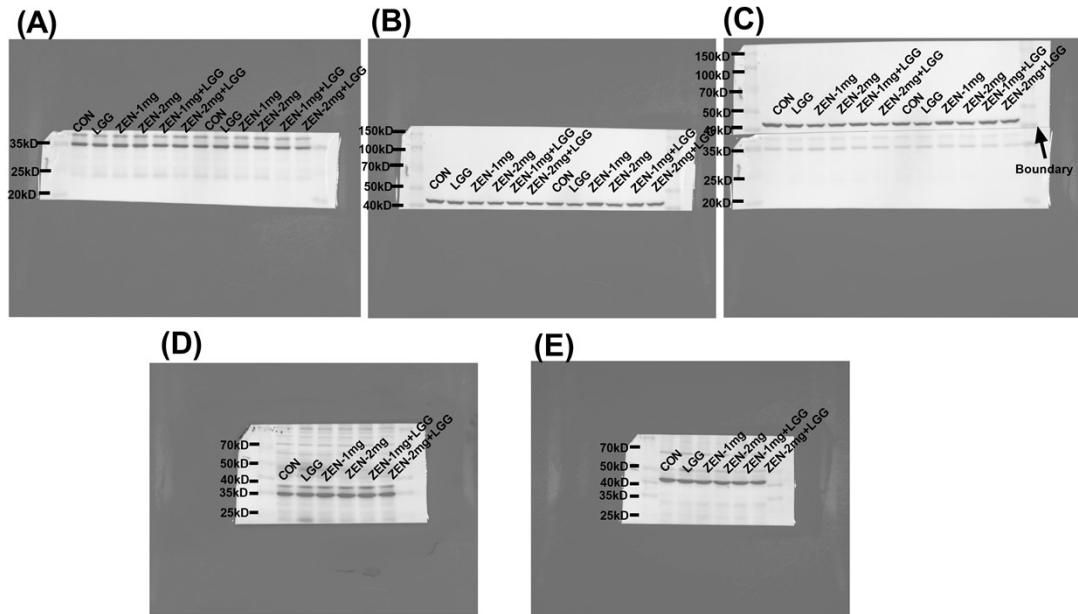

The raw data of Arg-1 protein expression in the liver from Figures 5. (A) Arg-1 protein expression; (B)  $\beta$ -actin protein expression; (C) Co-expression of Arg-1 and  $\beta$ -actin on the same membrane. (D) Arg-1 protein expression; (E)  $\beta$ -actin protein expression. Abbreviations: CON, the control group; LGG, the *Lactobacillus\_rhamnosus* GG group; ZEN-1mg, zearalenone at 1 mg/kg body weight; ZEN-2mg, zearalenone at 2 mg/kg body weight; ZEN-1mg+LGG, zearalenone at 1 mg/kg body weight plus *Lactobacillus\_rhamnosus* GG; ZEN-2mg+LGG, zearalenone at 1 mg/kg body weight plus *Lactobacillus\_rhamnosus* GG.
